# Supplementary material for: Selective resonance Raman enhancement of large amplitude inter-ring vibrations of [34](1,2,4,5)cyclophane radical cation; a model of π-stacked dimer radical ions
Source: Royal Society of Chemistry journal article supplement (doi:10.1039/c7cp06720h), 2017-12-19
Supplement: c7cp06720h1.pdf [file c7cp06720h1.pdf]

## Electronic supplementary information (ESI)

### **Selective resonance Raman enhancement of large amplitude inter-ring vibrations of [3<sub>4</sub>](1,2,4,5)cyclophane radical cation; a model of $\pi$ -stacked dimer radical ions**

Hajime Okajima<sup>\*a</sup>, Teruo Shinmyozu<sup>b</sup> and Akira Sakamoto<sup>\*a</sup>

<sup>a</sup> Department of Chemistry and Biological Science, College of Science and Engineering, Aoyama Gakuin University, 5-10-1 Fuchinobe, Chuo-ku, Sagami-hara, Kanagawa 252-5258, Japan.

<sup>b</sup> Institute for Materials Chemistry and Engineering (IMCE), Kyushu University, 6-10-1 Hakozaki, Higashi-ku, Fukuoka 812-8581, Japan.

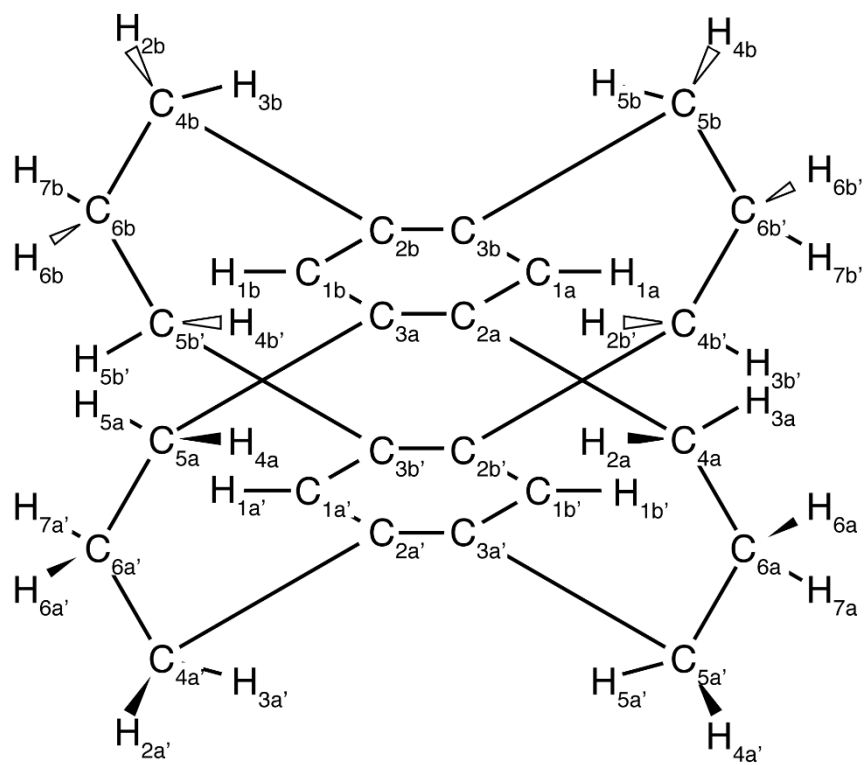

Fig. S1 Numbering of atoms for  $[3_4](1,2,4,5)$ cyclophane

Table S1 Structural parameters (bond lengths, angles, and dihedral angles) calculated for the neutral species and the radical cations in the ground  $S_0$  and excited  $S_2$  states of [3<sub>4</sub>](1,2,4,5)cyclophane. The numbering of atoms is defined in Fig. S1.

| Definitions                    | Bond lengths/Å and angles/deg |                             |                             |        |        |
|--------------------------------|-------------------------------|-----------------------------|-----------------------------|--------|--------|
|                                | Neutral                       | Radical cation              |                             | B - A  | C - B  |
|                                | $S_0$ [D <sub>2h</sub> ]      | $S_0$ [D <sub>2</sub> ] (B) | $S_2$ [D <sub>2</sub> ] (C) |        |        |
| $R(C_{1a}C_{2a})$              | 1.398                         | 1.395                       | 1.396                       | -0.003 | 0.001  |
| $R(C_{1a}C_{3b})$              |                               | 1.394                       | 1.395                       | -0.004 | 0.001  |
| $R(C_{2a}C_{3a})$              | 1.408                         | 1.435                       | 1.434                       | 0.027  | -0.001 |
| $R(C_{2a}C_{4a})$              | 1.522                         | 1.511                       | 1.514                       | -0.010 | 0.002  |
| $R(C_{3a}C_{5a})$              |                               | 1.511                       | 1.513                       | -0.011 | 0.002  |
| $R(C_{4a}C_{6a})$              | 1.550                         | 1.550                       | 1.557                       | 0.000  | 0.007  |
| $R(C_{6a}C_{5a})$              |                               | 1.551                       | 1.556                       | 0.001  | 0.006  |
| $R(C_{1a}H_{1a})$              | 1.087                         | 1.085                       | 1.086                       | -0.002 | 0.000  |
| $R(C_{4a}H_{2a})$              | 1.091                         | 1.089                       | 1.089                       | -0.002 | 0.000  |
| $R(C_{5a}H_{4a})$              |                               | 1.089                       | 1.089                       | -0.002 | 0.000  |
| $R(C_{4a}H_{3a})$              | 1.097                         | 1.096                       | 1.096                       | 0.000  | -0.001 |
| $R(C_{5a}H_{5a})$              |                               | 1.096                       | 1.095                       | -0.001 | -0.001 |
| $R(C_{6a}H_{6a})$              | 1.096                         | 1.093                       | 1.094                       | -0.003 | 0.000  |
| $R(C_{6a}H_{7a})$              | 1.094                         | 1.093                       | 1.092                       | -0.001 | -0.001 |
| $A(C_{2a}C_{1a}C_{3b})$        | 123.696                       | 123.082                     | 122.895                     | -0.614 | -0.187 |
| $A(C_{1a}C_{2a}C_{3a})$        | 117.856                       | 118.042                     | 118.090                     | 0.186  | 0.049  |
| $A(C_{1a}C_{2a}C_{4a})$        | 117.599                       | 118.101                     | 117.951                     | 0.502  | -0.150 |
| $A(C_{1b}C_{3a}C_{5a})$        |                               | 118.069                     | 117.858                     | 0.471  | -0.212 |
| $A(C_{3a}C_{2a}C_{4a})$        | 124.247                       | 123.779                     | 123.620                     | -0.468 | -0.159 |
| $A(C_{2a}C_{3a}C_{5a})$        |                               | 123.762                     | 123.611                     | -0.486 | -0.151 |
| $A(C_{2a}C_{4a}C_{6a})$        | 114.678                       | 113.849                     | 114.538                     | -0.829 | 0.690  |
| $A(C_{3a}C_{5a}C_{6a})$        |                               | 113.939                     | 114.541                     | -0.739 | 0.601  |
| $A(C_{4a}C_{6a}C_{5a})$        | 117.769                       | 115.919                     | 119.203                     | -1.850 | 3.284  |
| $A(C_{2a}C_{1a}H_{1a})$        | 117.888                       | 118.259                     | 118.317                     | 0.371  | 0.058  |
| $A(C_{3a}C_{1b}H_{1b})$        |                               | 118.163                     | 118.151                     | 0.275  | -0.012 |
| $D(C_{1a}C_{2a}C_{3a}C_{1b})$  | 0                             | 0.694                       | 0.833                       | 0.694  | 0.140  |
| $D(C_{4a}C_{2a}C_{3a}C_{5a})$  | 0                             | 0.390                       | 0.621                       | 0.390  | 0.231  |
| $D(C_{1a}C_{2a}C_{3a}C_{5a})$  | 173.566                       | 177.108                     | 173.793                     | 3.541  | -3.315 |
| $-D(C_{1b}C_{3a}C_{2a}C_{4a})$ |                               | 176.024                     | 172.338                     | 2.458  | -3.686 |
| $D(C_{3b}C_{1a}C_{2a}C_{4a})$  | 164.979                       | 166.116                     | 162.455                     | 1.136  | -3.661 |
| $-D(C_{2b}C_{1b}C_{3a}C_{5a})$ |                               | 166.536                     | 163.103                     | 1.557  | -3.433 |
| $D(C_{2a}C_{1a}C_{3b}C_{2b})$  | 9.021                         | 10.086                      | 10.267                      | 1.065  | 0.180  |
| $-D(C_{3a}C_{1b}C_{2b}C_{3b})$ |                               | 10.792                      | 11.109                      | 1.770  | 0.318  |
| $D(C_{2a}C_{3a}C_{1b}H_{1b})$  | 179.503                       | 177.448                     | 178.219                     | -2.056 | 0.771  |
| $-D(C_{3a}C_{2a}C_{1a}H_{1a})$ |                               | 178.146                     | 179.047                     | -1.358 | 0.901  |

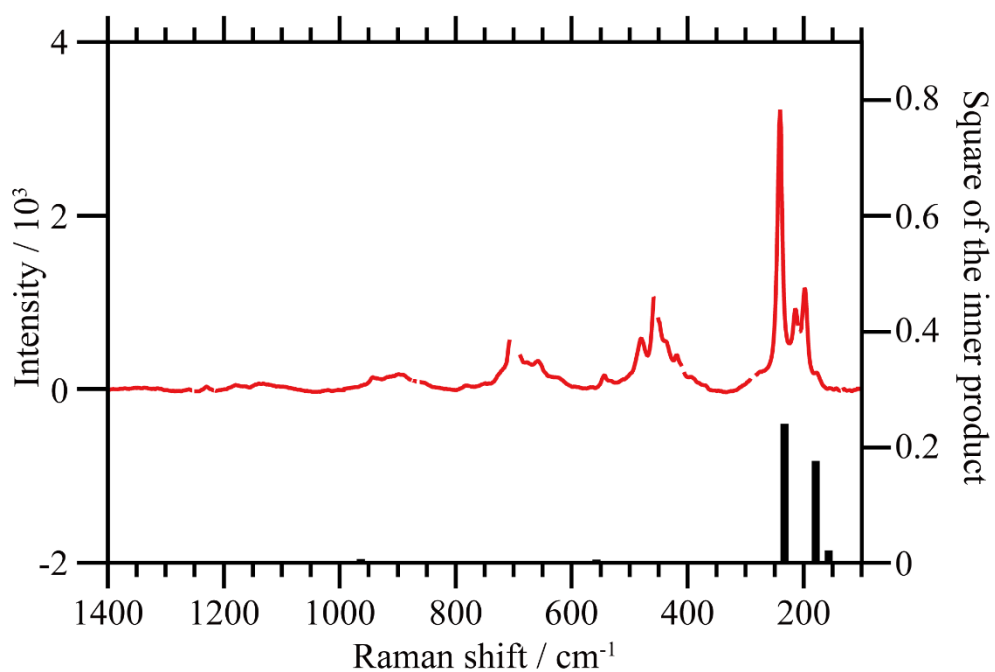

Fig. S2 Resonance Raman spectrum of [3<sub>4</sub>](1,2,4,5)cyclophane radical cation (red line) and a plot of squares of the inner products of the vibrational coordinates and the atomic displacements from the S<sub>0</sub> to S<sub>2</sub> states (See the text) calculated for the radical cation (black bars).
